# Supplementary material for: COVID-19 Serological Tests: How Well Do They Actually Perform?
Source: Preprints.org preprint supplement (doi:10.20944/preprints202006.0278.v1), 2020-06-21
Supplement: Supplementary file 1 [file supplementary]

## Sheet: raw data v2
No.	Test Name	Manufacturer	Test Format	Use Case	Target	Disease Stage (days)	Sensitivity	Specificity	Ref No.
1	IgG/IgM ELISA kits	Beijing Wantai Biological Pharmacy	ELISA	current infection	Total Ig	Early (~1-7)	38.3		1
1	IgG/IgM ELISA kits	Beijing Wantai Biological Pharmacy	ELISA	current infection	Total Ig	Intermediate (~8-14)	89.6		1
1	IgG/IgM ELISA kits	Beijing Wantai Biological Pharmacy	ELISA	current infection	Total Ig	Late (>14)	100		1
1	IgG/IgM ELISA kits	Beijing Wantai Biological Pharmacy	ELISA	current infection	Total Ig	Overall	93.1	99.1	1
2	Wantai SARS-CoV-2 Ab ELISA	Beijing Wantai Biological Pharmacy	ELISA	n/a	Total Ig	Overall	95.4	100	15
2	Wantai SARS-CoV-2 Ab ELISA	Beijing Wantai Biological Pharmacy	ELISA	n/a	Total Ig	Early (~1-7)	64.1		9
2	Wantai SARS-CoV-2 Ab ELISA	Beijing Wantai Biological Pharmacy	ELISA	n/a	Total Ig	Intermediate (~8-14)	98.7		9
2	Wantai SARS-CoV-2 Ab ELISA	Beijing Wantai Biological Pharmacy	ELISA	n/a	Total Ig	Late (>14)	100		9
1	IgG/IgM ELISA kits	Beijing Wantai Biological Pharmacy	ELISA	current infection	IgM	Early (~1-7)	28.7		1
1	IgG/IgM ELISA kits	Beijing Wantai Biological Pharmacy	ELISA	current infection	IgM	Intermediate (~8-14)	73.3		1
1	IgG/IgM ELISA kits	Beijing Wantai Biological Pharmacy	ELISA	current infection	IgM	Late (>14)			1
1	IgG/IgM ELISA kits	Beijing Wantai Biological Pharmacy	ELISA	current infection	IgM	Overall	82.7	98.6	1
1	IgG/IgM ELISA kits	Beijing Wantai Biological Pharmacy	ELISA	current infection	IgG	Early (~1-7)	19.1		1
1	IgG/IgM ELISA kits	Beijing Wantai Biological Pharmacy	ELISA	current infection	IgG	Intermediate (~8-14)	54.1		1
1	IgG/IgM ELISA kits	Beijing Wantai Biological Pharmacy	ELISA	current infection	IgG	Late (>14)	79.8		1
1	IgG/IgM ELISA kits	Beijing Wantai Biological Pharmacy	ELISA	current infection	IgG	Overall	64.7	99	1
3	Wantai SARS-CoV-2 IgG ELISA	Beijing Wantai Biological Pharmacy	ELISA	n/a	IgG	Early (~1-7)	33.3		9
3	Wantai SARS-CoV-2 IgG ELISA	Beijing Wantai Biological Pharmacy	ELISA	n/a	IgG	Intermediate (~8-14)	76		9
3	Wantai SARS-CoV-2 IgG ELISA	Beijing Wantai Biological Pharmacy	ELISA	n/a	IgG	Late (>14)	93.3		9
3	Wantai SARS-CoV-2 IgG ELISA	Beijing Wantai Biological Pharmacy	ELISA	n/a	IgG	Overall	88.8	100	9
4	Wantai SARS-CoV-2 IgM ELISA	Beijing Wantai Biological Pharmacy	ELISA	n/a	IgM	Early (~1-7)	33.3		9
4	Wantai SARS-CoV-2 IgM ELISA	Beijing Wantai Biological Pharmacy	ELISA	n/a	IgM	Intermediate (~8-14)	86.7		9
4	Wantai SARS-CoV-2 IgM ELISA	Beijing Wantai Biological Pharmacy	ELISA	n/a	IgM	Late (>14)	96.7		9
4	Wantai SARS-CoV-2 IgM ELISA	Beijing Wantai Biological Pharmacy	ELISA	n/a	IgM	Overall	92.5	100	9
5	Wantai SARS-CoV-2 Ab Rapid Test	Beijing Wantai Biological Pharmacy	RDT	n/a	Total Ig	Overall	97.5	95.2	9
5	Wantai SARS-CoV-2 IgM Rapid Test	Beijing Wantai Biological Pharmacy	RDT	n/a	IgM	Overall	88.8	98.1	9
5	Wantai SARS-CoV-2 IgG Rapid Test	Beijing Wantai Biological Pharmacy	RDT	n/a	IgG	Overall	86.2	99.5	9
6	CMIA-IgM	Xiamen InnoDx Biotech Co., Ltd.	CLIA	n/a	IgM	Overall	86.2	99.3	9
6	CMIA-Ab	Xiamen InnoDx Biotech Co., Ltd.	CLIA	n/a	Total Ig	Overall	96.2	99.3	9
7	IgG/IgM ELISA kit	Zhuhai Livzon Diagnostics Inc	ELISA	current infection	IgM	Late (>14)	77.3	100	2
7	IgG/IgM ELISA kit	Zhuhai Livzon Diagnostics Inc	ELISA	current infection	IgG	Late (>14)	83.3	95	2
8	2019-nCoV IgG/IgM Antibody Detection Kit	Zhuhai Lizhu Reagent	ELISA	current infection	IgG	Early (~1-7)	31.8	100	3
8	2019-nCoV IgG/IgM Antibody Detection Kit	Zhuhai Lizhu Reagent	ELISA	current infection	IgG	Intermediate (~8-14)	58.7	100	3
8	2019-nCoV IgG/IgM Antibody Detection Kit	Zhuhai Lizhu Reagent	ELISA	current infection	IgG	Late (>14)	89	100	3
8	2019-nCoV IgG/IgM Antibody Detection Kit	Zhuhai Lizhu Reagent	ELISA	current infection	IgG	Overall	70.1	100	3
8	2019-nCoV IgG/IgM Antibody Detection Kit	Zhuhai Lizhu Reagent	ELISA	current infection	IgG; IgM	Early (~1-7)	40.9	100	3
8	2019-nCoV IgG/IgM Antibody Detection Kit	Zhuhai Lizhu Reagent	ELISA	current infection	IgG; IgM	Intermediate (~8-14)	73.9	100	3
8	2019-nCoV IgG/IgM Antibody Detection Kit	Zhuhai Lizhu Reagent	ELISA	current infection	IgG; IgM	Late (>14)	95	100	3
8	2019-nCoV IgG/IgM Antibody Detection Kit	Zhuhai Lizhu Reagent	ELISA	current infection	IgG; IgM	Overall	80.4	100	3
8	2019-nCoV IgG/IgM Antibody Detection Kit	Zhuhai Lizhu Reagent	ELISA	current infection	IgM	Early (~1-7)	31.8	100	3
8	2019-nCoV IgG/IgM Antibody Detection Kit	Zhuhai Lizhu Reagent	ELISA	current infection	IgM	Intermediate (~8-14)	64.1	100	3
8	2019-nCoV IgG/IgM Antibody Detection Kit	Zhuhai Lizhu Reagent	ELISA	current infection	IgM	Late (>14)	80	100	3
8	2019-nCoV IgG/IgM Antibody Detection Kit	Zhuhai Lizhu Reagent	ELISA	current infection	IgM	Overall	68.2	100	3
9	SARS-CoV-2 IgM/IgG CLIA kits	Shenzhen Yhlo Biotech	CLIA	current infection	IgG	Intermediate (~8-14)			4
9	SARS-CoV-2 IgM/IgG CLIA kits	Shenzhen Yhlo Biotech	CLIA	current infection	IgG	Late (>14)			4
10	Chemiluminescence detection kit	Shenzhen Yhlo Biotech	CLIA	current infection	IgM	Overall	100	98.5	7
10	Chemiluminescence detection kit	Shenzhen Yhlo Biotech	CLIA	current infection	IgG	Overall	100	99	7
10	2019-nCoV IgG/IgM Antibody Detection Kit	Beijing Hotgen Biotech	ELISA	current infection	IgG	Early (~1-7)	40.9	100	3
10	2019-nCoV IgG/IgM Antibody Detection Kit	Beijing Hotgen Biotech	ELISA	current infection	IgG	Intermediate (~8-14)	65.2	100	3
10	2019-nCoV IgG/IgM Antibody Detection Kit	Beijing Hotgen Biotech	ELISA	current infection	IgG	Late (>14)	90	100	3
10	2019-nCoV IgG/IgM Antibody Detection Kit	Beijing Hotgen Biotech	ELISA	current infection	IgG	Overall	74.3	100	3
10	2019-nCoV IgG/IgM Antibody Detection Kit	Beijing Hotgen Biotech	ELISA	current infection	IgM	Early (~1-7)	36.4	100	3
10	2019-nCoV IgG/IgM Antibody Detection Kit	Beijing Hotgen Biotech	ELISA	current infection	IgM	Intermediate (~8-14)	69.6	100	3
10	2019-nCoV IgG/IgM Antibody Detection Kit	Beijing Hotgen Biotech	ELISA	current infection	IgM	Late (>14)	93	100	3
10	2019-nCoV IgG/IgM Antibody Detection Kit	Beijing Hotgen Biotech	ELISA	current infection	IgM	Overall	77.1	100	3
10	2019-nCoV IgG/IgM Antibody Detection Kit	Beijing Hotgen Biotech	ELISA	current infection	IgG; IgM	Early (~1-7)	45.5	100	3
10	2019-nCoV IgG/IgM Antibody Detection Kit	Beijing Hotgen Biotech	ELISA	current infection	IgG; IgM	Intermediate (~8-14)	78.3	100	3
10	2019-nCoV IgG/IgM Antibody Detection Kit	Beijing Hotgen Biotech	ELISA	current infection	IgG; IgM	Late (>14)	94	100	3
10	2019-nCoV IgG/IgM Antibody Detection Kit	Beijing Hotgen Biotech	ELISA	current infection	IgG; IgM	Overall	82.2	100	3
11	2019-nCoV IgG/IgM Rapid Test Cassette	Zhejang Orient Gene Biotech	RDT	current infection	IgG; IgM	Early (~1-7)	0	92.3	5
11	2019-nCoV IgG/IgM Rapid Test Cassette	Zhejang Orient Gene Biotech	RDT	current infection	IgG; IgM	Intermediate (~8-14)	33.3	74.1	5
11	2019-nCoV IgG/IgM Rapid Test Cassette	Zhejang Orient Gene Biotech	RDT	current infection	IgG; IgM	Late (>14)	50	76.5	5
12	STANDARD Q COVID-19 IgM/IgG Duo Test	SD BIOSENSOR, Inc.	RDT	n/a	IgG; IgM	Overall	58	97.6	20
13	MAGLUMI 2019-nCoV IgM (CLIA)	Snibe Co.	CLIA	n/a	IgM	Overall	49.5667	98.4	20
13	MAGLUMI 2019-nCoV IgG (CLIA)	Snibe Co.	CLIA	n/a	IgG	Early (~1-7)	45.5	95.1	20
13	MAGLUMI 2019-nCoV IgG (CLIA)	Snibe Co.	CLIA	current infection	IgG	Overall	98.8	95.1	20
14	COVID-19 IgG/IgM Combo Rapid Test Device	Liming Bio-Products	RDT	n/a	IgG; IgM	Overall	78.5667	100	20
15	AllTest COV-19 IgG / IgM kit	AllTest Biotech	RDT	current infection	IgG; IgM	Early (~1-7)	12.5		6
15	AllTest COV-19 IgG / IgM kit	AllTest Biotech	RDT	current infection	IgG; IgM	Intermediate (~8-14)	33.3		6
15	AllTest COV-19 IgG / IgM kit	AllTest Biotech	RDT	current infection	IgG; IgM	Late (>14)	73.9		6
15	AllTest COV-19 IgG / IgM kit	AllTest Biotech	RDT	current infection	IgG; IgM	Overall	47.3	48.1	6
16	Cellex qSARS-CoV-2 IgGIgM Cassette Rapid Test	Cellex	RDT	n/a	IgG; IgM	Overall	77.025	96.6	20
16	Cellex qSARS-CoV-2 IgGIgM Cassette Rapid Test	Cellex	RDT	current & past infection	IgG	Early (~1-7)	31.8	92.3	20
16	Cellex qSARS-CoV-2 IgGIgM Cassette Rapid Test	Cellex	RDT	current & past infection	IgG	Intermediate (~8-14)	86.95	92.3	20
16	Cellex qSARS-CoV-2 IgGIgM Cassette Rapid Test	Cellex	RDT	current & past infection	IgG	Late (>14)	96	92.3	20
16	Cellex qSARS-CoV-2 IgGIgM Cassette Rapid Test	Cellex	RDT	current & past infection	IgG	Overall	64.95	93.9	20
16	Cellex qSARS-CoV-2 IgGIgM Cassette Rapid Test	Cellex	RDT	current & past infection	IgM	Early (~1-7)	40.9	92.3	20
16	Cellex qSARS-CoV-2 IgGIgM Cassette Rapid Test	Cellex	RDT	current & past infection	IgM	Intermediate (~8-14)	91.3	92.3	20
16	Cellex qSARS-CoV-2 IgGIgM Cassette Rapid Test	Cellex	RDT	current & past infection	IgM	Late (>14)	96	92.3	20
16	Cellex qSARS-CoV-2 IgGIgM Cassette Rapid Test	Cellex	RDT	current & past infection	IgM	Overall	63.0667	94.6333	20
16	Cellex qSARS-CoV-2 IgGIgM Cassette Rapid Test	Cellex	RDT	current & past infection	IgG; IgM	Intermediate (~8-14)			20
16	Cellex qSARS-CoV-2 IgGIgM Cassette Rapid Test	Cellex	RDT	current & past infection	IgG; IgM	Late (>14)			20
17	SARS-CoV-2 IgM/IgG Ab Rapid Test	Shanghai Kehua Bio-engineering	RDT	n/a	IgG; IgM	Overall	70.6	100	20
18	COVID-19 rapid test	PRIMA Lab S.A.	RDT	n/a	IgG; IgM	Overall	74.15	87.1	20
19	COVID-19 ELISA IgG	DIA PRO Diagnostic BioProbes	ELISA	n/a	IgG	Overall	91.3	90	20
20	COVID-19 ELISA IgG	Epitope Diagnostics	ELISA	n/a	IgG	Overall	80.9	90	20
20	COVID-19 IgM ELISA Assay	Epitope Diagnostics	ELISA	n/a	IgM	Overall	17.4	100	20
21	VivaDiag COVID-19 IgM/IgG Rapid Test	VivaChek Biotech	RDT	current infection	IgG; IgM	Overall	58.075	87.05	8
22	Coronavirus IgG/IgM antibody GICA kit	Zhuhai Livzon Diagnostics	RDT	n/a	IgG; IgM	Overall	82.4	100	9
22	Coronavirus IgG/IgM antibody GICA kit	Zhuhai Livzon Diagnostics	RDT	n/a	IgG	Overall	81.3	100	9
22	Coronavirus IgG/IgM antibody GICA kit	Zhuhai Livzon Diagnostics	RDT	n/a	IgM	Overall	57.1	100	9
23	SARS-CoV-2 ELISA	Darui Biotech	ELISA	current & past infection	IgM	Overall	46.2	78.1	10
23	SARS-CoV-2 ELISA	Darui Biotech	ELISA	current & past infection	IgG	Overall	23.1	100	10
24	Rapid SARS-CoV-2 Antibody (IgM/IgG)	InTec Products	RDT	current & past infection	IgG; IgM	Overall	89.2	73.4	20
25	COVID-19 IgG/IgM Rapid Test Cassette (Whole Blood/Serum/Plasma)	Orient Gene / Healgen	RDT	current & past infection	IgG; IgM	Overall	80	100	20
26	2019-nCoV IgG/IgM Rapid Test	Dynamiker Biotechnology	RDT	current & past infection	IgG	Early (~1-7)	25	92.3	20
26	2019-nCoV IgG/IgM Rapid Test	Dynamiker Biotechnology	RDT	current & past infection	IgG	Intermediate (~8-14)	100	92.3	20
26	2019-nCoV IgG/IgM Rapid Test	Dynamiker Biotechnology	RDT	current & past infection	IgG	Late (>14)		92.3	20
26	2019-nCoV IgG/IgM Rapid Test	Dynamiker Biotechnology	RDT	current & past infection	IgG	Overall	56	92.3	20
26	2019-nCoV IgG/IgM Rapid Test	Dynamiker Biotechnology	RDT	n/a	IgG; IgM	Overall	90	100	15
26	2019-nCoV IgG/IgM Rapid Test	Dynamiker Biotechnology	RDT	current & past infection	IgM	Early (~1-7)		92.3	20
26	2019-nCoV IgG/IgM Rapid Test	Dynamiker Biotechnology	RDT	current & past infection	IgM	Intermediate (~8-14)	100	92.3	20
26	2019-nCoV IgG/IgM Rapid Test	Dynamiker Biotechnology	RDT	current & past infection	IgM	Late (>14)		92.3	20
26	2019-nCoV IgG/IgM Rapid Test	Dynamiker Biotechnology	RDT	current & past infection	IgM	Overall	60	92.3	20
27	Novel Coronavirus IgG/IgM antibody ELISA kit	Zhuhai Livzon Diagnostics	ELISA	n/a	IgM	Overall	44.4	100	12
27	Novel Coronavirus IgG/IgM antibody ELISA kit	Zhuhai Livzon Diagnostics	ELISA	n/a	IgG	Overall	82.5	100	12
27	Novel Coronavirus IgG/IgM antibody ELISA kit	Zhuhai Livzon Diagnostics	ELISA	n/a	IgG; IgM	Overall	87.3	100	12
28	Novel Coronavirus (2019- nCoV) IgM/IgG Antibody Test Kit	Zhuhai Livzon Diagnostics	RDT	current & past infection	IgG; IgM	Overall	68.6	63.6	14
28	Novel Coronavirus (2019- nCoV) IgM/IgG Antibody Test Kit	Zhuhai Livzon Diagnostics	RDT	current & past infection	IgG	Early (~1-7)	3.7	44.4	14
28	Novel Coronavirus (2019- nCoV) IgM/IgG Antibody Test Kit	Zhuhai Livzon Diagnostics	RDT	current & past infection	IgG	Intermediate (~8-14)	57.1	66.7	14
28	Novel Coronavirus (2019- nCoV) IgM/IgG Antibody Test Kit	Zhuhai Livzon Diagnostics	RDT	current & past infection	IgG	Late (>14)	96.8	71.4	14
28	Novel Coronavirus (2019- nCoV) IgM/IgG Antibody Test Kit	Zhuhai Livzon Diagnostics	RDT	current & past infection	IgG	Overall	54.7	59.1	14
28	Novel Coronavirus (2019- nCoV) IgM/IgG Antibody Test Kit	Zhuhai Livzon Diagnostics	RDT	current & past infection	IgM	Early (~1-7)	11.1	22.2	14
28	Novel Coronavirus (2019- nCoV) IgM/IgG Antibody Test Kit	Zhuhai Livzon Diagnostics	RDT	current & past infection	IgM	Intermediate (~8-14)	78.6	33.3	14
28	Novel Coronavirus (2019- nCoV) IgM/IgG Antibody Test Kit	Zhuhai Livzon Diagnostics	RDT	current & past infection	IgM	Late (>14)	74.2	57.1	14
28	Novel Coronavirus (2019- nCoV) IgM/IgG Antibody Test Kit	Zhuhai Livzon Diagnostics	RDT	current & past infection	IgM	Overall	55.8	36.4	14
21	VivaDiag COVID-19 IgM/IgG Rapid Test	VivaChek Biotech	RDT	past infection	IgG	Overall	80	100	8
29	Anti-SARS-CoV-2 ELISA (IgG) (manual, automated)	EUROIMMUN AG	ELISA	n/a	IgG	Overall	66.7	96.3	15
29	Anti-SARS-CoV-2 ELISA (IgA) (manual, automated)	EUROIMMUN AG	ELISA	n/a	IgA	Overall	93.3	92.7	15
30	OnSite COVID-19 IgG/IgM Rapid Test	CTK Biotech, Inc.	RDT	n/a	IgG; IgM	Overall	90	100	15
31	Anti-SARS-CoV-2 Rapid Test	AutoBio Diagnostics	RDT	n/a	IgG; IgM	Overall	93.3	100	15
32	Coronavirus Diseases 2019 (COVID-19) IgM/IgG Antibody Test	Artron Laboratories	RDT	n/a	IgG; IgM	Overall	83.3	100	15
33	NG-Test IgM-IgG COVID All-in-One lateral flow immunoassay	NG Biotech	RDT	past infection	IgG; IgM	Late (>14)	97	100	20
34	Covid-19 IgG/IgM Antibody Test	Biomerica	RDT	current & past infection	IgM	Early (~1-7)	42.9	100	20
34	Covid-19 IgG/IgM Antibody Test	Biomerica	RDT	current & past infection	IgM	Intermediate (~8-14)	16.7	100	20
34	Covid-19 IgG/IgM Antibody Test	Biomerica	RDT	current & past infection	IgM	Late (>14)	0	100	20
34	Covid-19 IgG/IgM Antibody Test	Biomerica	RDT	current & past infection	IgM	Overall	17.4	100	20
34	Covid-19 IgG/IgM Antibody Test	Biomerica	RDT	current & past infection	IgG	Early (~1-7)	57.1	100	20
34	Covid-19 IgG/IgM Antibody Test	Biomerica	RDT	current & past infection	IgG	Intermediate (~8-14)	100	100	20
34	Covid-19 IgG/IgM Antibody Test	Biomerica	RDT	current & past infection	IgG	Late (>14)	60	100	20
34	Covid-19 IgG/IgM Antibody Test	Biomerica	RDT	current & past infection	IgG	Overall	69.6	100	20
35	Acro Biotech COVID-19 Rapid POC test	Acro Biotech	RDT	current & past infection	IgG	Early (~1-7)	57.1	100	20
35	Acro Biotech COVID-19 Rapid POC test	Acro Biotech	RDT	current & past infection	IgG	Intermediate (~8-14)	100	100	20
35	Acro Biotech COVID-19 Rapid POC test	Acro Biotech	RDT	current & past infection	IgG	Late (>14)	60	100	20
35	Acro Biotech COVID-19 Rapid POC test	Acro Biotech	RDT	current & past infection	IgG	Overall	69.6	100	20
35	Acro Biotech COVID-19 Rapid POC test	Acro Biotech	RDT	current & past infection	IgM	Early (~1-7)	57.1	100	20
35	Acro Biotech COVID-19 Rapid POC test	Acro Biotech	RDT	current & past infection	IgM	Intermediate (~8-14)	33.3	100	20
35	Acro Biotech COVID-19 Rapid POC test	Acro Biotech	RDT	current & past infection	IgM	Late (>14)	60	100	20
35	Acro Biotech COVID-19 Rapid POC test	Acro Biotech	RDT	current & past infection	IgM	Overall	52.2	100	20
36	Rapid SARS-CoV-2 Antibody (IgM/IgG)	InTec Products	RDT	current & past infection	IgG	Early (~1-7)	59.1	92.3	20
36	Rapid SARS-CoV-2 Antibody (IgM/IgG)	InTec Products	RDT	current & past infection	IgG	Intermediate (~8-14)	95.65	92.3	20
36	Rapid SARS-CoV-2 Antibody (IgM/IgG)	InTec Products	RDT	current & past infection	IgG	Late (>14)	79.8	92.3	20
36	Rapid SARS-CoV-2 Antibody (IgM/IgG)	InTec Products	RDT	current & past infection	IgG	Overall	78.45	89.1	20
36	Rapid SARS-CoV-2 Antibody (IgM/IgG)	InTec Products	RDT	current & past infection	IgM	Early (~1-7)	64.75	92.3	20
36	Rapid SARS-CoV-2 Antibody (IgM/IgG)	InTec Products	RDT	current & past infection	IgM	Intermediate (~8-14)	93.5	92.3	20
36	Rapid SARS-CoV-2 Antibody (IgM/IgG)	InTec Products	RDT	current & past infection	IgM	Late (>14)	71.8	92.3	20
36	Rapid SARS-CoV-2 Antibody (IgM/IgG)	InTec Products	RDT	current & past infection	IgM	Overall	76.7	86	20
36	Rapid SARS-CoV-2 Antibody (IgM/IgG)	InTec Products	RDT	current & past infection	IgG; IgM	Intermediate (~8-14)			20
36	Rapid SARS-CoV-2 Antibody (IgM/IgG)	InTec Products	RDT	current & past infection	IgG; IgM	Late (>14)			20
36	Rapid SARS-CoV-2 Antibody (IgM/IgG)	InTec Products	RDT	current & past infection	IgG; IgM	Overall	94.4	73.4	20
37	DiagnoSure COVID-19 IgG/IgM rapid test cassette	GritOverseas Pte.	RDT	current & past infection	IgG	Early (~1-7)	28.6	100	20
37	DiagnoSure COVID-19 IgG/IgM rapid test cassette	GritOverseas Pte.	RDT	current & past infection	IgG	Intermediate (~8-14)	100	100	20
37	DiagnoSure COVID-19 IgG/IgM rapid test cassette	GritOverseas Pte.	RDT	current & past infection	IgG	Late (>14)	0	100	20
37	DiagnoSure COVID-19 IgG/IgM rapid test cassette	GritOverseas Pte.	RDT	current & past infection	IgG	Overall	34.8	100	20
37	DiagnoSure COVID-19 IgG/IgM rapid test cassette	GritOverseas Pte.	RDT	current & past infection	IgM	Early (~1-7)	57.1	100	20
37	DiagnoSure COVID-19 IgG/IgM rapid test cassette	GritOverseas Pte.	RDT	current & past infection	IgM	Intermediate (~8-14)	100	100	20
37	DiagnoSure COVID-19 IgG/IgM rapid test cassette	GritOverseas Pte.	RDT	current & past infection	IgM	Late (>14)	20	100	20
37	DiagnoSure COVID-19 IgG/IgM rapid test cassette	GritOverseas Pte.	RDT	current & past infection	IgM	Overall	52.2	100	20
38	Diagnostic kit IgM/IgG of Novel Coronavirus COVID-19	Shanghai LiangRun, Biomedicine Tech	RDT	current & past infection	IgG	Early (~1-7)	28.6	100	20
38	Diagnostic kit IgM/IgG of Novel Coronavirus COVID-19	Shanghai LiangRun, Biomedicine Tech	RDT	current & past infection	IgG	Intermediate (~8-14)	66.7	100	20
38	Diagnostic kit IgM/IgG of Novel Coronavirus COVID-19	Shanghai LiangRun, Biomedicine Tech	RDT	current & past infection	IgG	Late (>14)	0	100	20
38	Diagnostic kit IgM/IgG of Novel Coronavirus COVID-19	Shanghai LiangRun, Biomedicine Tech	RDT	current & past infection	IgG	Overall	26.1	100	20
38	Diagnostic kit IgM/IgG of Novel Coronavirus COVID-19	Shanghai LiangRun, Biomedicine Tech	RDT	current & past infection	IgM	Early (~1-7)	0	100	20
38	Diagnostic kit IgM/IgG of Novel Coronavirus COVID-19	Shanghai LiangRun, Biomedicine Tech	RDT	current & past infection	IgM	Intermediate (~8-14)	0	100	20
38	Diagnostic kit IgM/IgG of Novel Coronavirus COVID-19	Shanghai LiangRun, Biomedicine Tech	RDT	current & past infection	IgM	Late (>14)	10	100	20
38	Diagnostic kit IgM/IgG of Novel Coronavirus COVID-19	Shanghai LiangRun, Biomedicine Tech	RDT	current & past infection	IgM	Overall	4.3	100	20
39	COVID-19 IgG/IgM Rapid Test Cassette (Whole Blood/Serum/Plasma)	Orient Gene / Healgen	RDT	current & past infection	IgG	Early (~1-7)	47.6		20
39	COVID-19 IgG/IgM Rapid Test Cassette (Whole Blood/Serum/Plasma)	Orient Gene / Healgen	RDT	current & past infection	IgG	Intermediate (~8-14)	72.7		20
39	COVID-19 IgG/IgM Rapid Test Cassette (Whole Blood/Serum/Plasma)	Orient Gene / Healgen	RDT	current & past infection	IgG	Late (>14)	100		20
39	COVID-19 IgG/IgM Rapid Test Cassette (Whole Blood/Serum/Plasma)	Orient Gene / Healgen	RDT	current & past infection	IgG	Overall	74.4	100	20
39	COVID-19 IgG/IgM Rapid Test Cassette (Whole Blood/Serum/Plasma)	Orient Gene / Healgen	RDT	current & past infection	IgM	Early (~1-7)	57.1		20
39	COVID-19 IgG/IgM Rapid Test Cassette (Whole Blood/Serum/Plasma)	Orient Gene / Healgen	RDT	current & past infection	IgM	Intermediate (~8-14)	77.3		20
39	COVID-19 IgG/IgM Rapid Test Cassette (Whole Blood/Serum/Plasma)	Orient Gene / Healgen	RDT	current & past infection	IgM	Late (>14)	72		20
39	COVID-19 IgG/IgM Rapid Test Cassette (Whole Blood/Serum/Plasma)	Orient Gene / Healgen	RDT	current & past infection	IgM	Overall	71.1	100	20
39	COVID-19 IgG/IgM Rapid Test Cassette (Whole Blood/Serum/Plasma)	Orient Gene / Healgen	RDT	current & past infection	IgG; IgM	Intermediate (~8-14)			20
39	COVID-19 IgG/IgM Rapid Test Cassette (Whole Blood/Serum/Plasma)	Orient Gene / Healgen	RDT	current & past infection	IgG; IgM	Late (>14)			20
39	COVID-19 IgG/IgM Rapid Test Cassette (Whole Blood/Serum/Plasma)	Orient Gene / Healgen	RDT	current & past infection	IgG; IgM	Overall	87	100	20
40	COVID-19 rapid test	PharmaAct AG	RDT	past infection	IgG; IgM	Late (>14)	36.4	88.9	16
21	VivaDiag COVID-19 IgM/IgG Rapid Test	VivaChek Biotech	RDT	past infection	IgM	Overall	83.3	100	8
41	Rapid SARS-CoV-2 Antibody (IgM/IgG)	AMEDA Labordiagnostik GmbH	RDT	past infection	IgG; IgM	Late (>14)	95.7	97.4	20
42	SARS-CoV-2 IgM/IgG Ab Rapid Test	Sure Bio-Tech (USA)	RDT	current & past infection	IgG; IgM	Overall	71.55	100	20
42	SARS-CoV-2 IgM/IgG Ab Rapid Test	Sure Bio-Tech (USA)	RDT	current & past infection	IgM	Early (~1-7)	11.1	100	17
42	SARS-CoV-2 IgM/IgG Ab Rapid Test	Sure Bio-Tech (USA)	RDT	current & past infection	IgM	Intermediate (~8-14)	52.9	100	17
42	SARS-CoV-2 IgM/IgG Ab Rapid Test	Sure Bio-Tech (USA)	RDT	current & past infection	IgM	Late (>14)	68.8	100	17
42	SARS-CoV-2 IgM/IgG Ab Rapid Test	Sure Bio-Tech (USA)	RDT	current & past infection	IgM	Overall	48.1	100	17
42	SARS-CoV-2 IgM/IgG Ab Rapid Test	Sure Bio-Tech (USA)	RDT	current & past infection	IgG	Early (~1-7)	18.5	100	17
42	SARS-CoV-2 IgM/IgG Ab Rapid Test	Sure Bio-Tech (USA)	RDT	current & past infection	IgG	Intermediate (~8-14)	62.9	100	17
42	SARS-CoV-2 IgM/IgG Ab Rapid Test	Sure Bio-Tech (USA)	RDT	current & past infection	IgG	Late (>14)	75	100	17
42	SARS-CoV-2 IgM/IgG Ab Rapid Test	Sure Bio-Tech (USA)	RDT	current & past infection	IgG	Overall	56.6	100	17
42	SARS-CoV-2 IgM/IgG Ab Rapid Test	Sure Bio-Tech (USA)	RDT	current & past infection	IgG; IgM	Early (~1-7)	18.5	100	17
42	SARS-CoV-2 IgM/IgG Ab Rapid Test	Sure Bio-Tech (USA)	RDT	current & past infection	IgG; IgM	Intermediate (~8-14)	62.9	100	17
42	SARS-CoV-2 IgM/IgG Ab Rapid Test	Sure Bio-Tech (USA)	RDT	current & past infection	IgG; IgM	Late (>14)	78.1	100	17
43	COVID-19 IgM-IgG Dual Antibody Rapid Test	BioMedomics	RDT	current & past infection	IgM	Early (~1-7)	26.9	87.9	17
43	COVID-19 IgM-IgG Dual Antibody Rapid Test	BioMedomics	RDT	current & past infection	IgM	Intermediate (~8-14)	67.1	87.9	17
43	COVID-19 IgM-IgG Dual Antibody Rapid Test	BioMedomics	RDT	current & past infection	IgM	Late (>14)	78.1	87.9	17
43	COVID-19 IgM-IgG Dual Antibody Rapid Test	BioMedomics	RDT	current & past infection	IgM	Overall	61.7	87.9	17
43	COVID-19 IgM-IgG Dual Antibody Rapid Test	BioMedomics	RDT	current & past infection	IgG	Early (~1-7)	23.1	96.3	17
43	COVID-19 IgM-IgG Dual Antibody Rapid Test	BioMedomics	RDT	current & past infection	IgG	Intermediate (~8-14)	60	96.3	17
43	COVID-19 IgM-IgG Dual Antibody Rapid Test	BioMedomics	RDT	current & past infection	IgG	Late (>14)	71.9	96.3	17
43	COVID-19 IgM-IgG Dual Antibody Rapid Test	BioMedomics	RDT	current & past infection	IgG	Overall	55.5	96.3	17
43	COVID-19 IgM-IgG Dual Antibody Rapid Test	BioMedomics	RDT	current & past infection	IgG; IgM	Early (~1-7)	30.8	86.9	17
43	COVID-19 IgM-IgG Dual Antibody Rapid Test	BioMedomics	RDT	current & past infection	IgG; IgM	Intermediate (~8-14)	70	86.9	17
43	COVID-19 IgM-IgG Dual Antibody Rapid Test	BioMedomics	RDT	current & past infection	IgG; IgM	Late (>14)	81.2	86.9	17
43	COVID-19 IgM-IgG Dual Antibody Rapid Test	BioMedomics	RDT	current & past infection	IgG; IgM	Overall	64.8	86.9	17
44	Novel Coronavirus (2019-nCoV) Ab Test (Colloidal Gold)	Innovita Biological Technology	RDT	current & past infection	IgG	Early (~1-7)	25.9	100	17
44	Novel Coronavirus (2019-nCoV) Ab Test (Colloidal Gold)	Innovita Biological Technology	RDT	current & past infection	IgG	Intermediate (~8-14)	60.9	100	17
44	Novel Coronavirus (2019-nCoV) Ab Test (Colloidal Gold)	Innovita Biological Technology	RDT	current & past infection	IgG	Late (>14)	65	100	17
44	Novel Coronavirus (2019-nCoV) Ab Test (Colloidal Gold)	Innovita Biological Technology	RDT	current & past infection	IgG	Overall	53.4	100	17
45	SARS-CoV-2 rapid IgG-IgM Viva-DiagTM Test combined antibody test kit	Jiangsu Medomics Medical Technologies	RDT	current & past infection	IgG; IgM	Overall	64.3	91.6667	11
45	SARS?CoV?2 rapid IgG?IgM combined antibody test kit	Jiangsu Medomics Medical Technologies	RDT	current infection	IgM	Overall	44.6	94.65	13
45	SARS?CoV?2 rapid IgG?IgM combined antibody test kit	Jiangsu Medomics Medical Technologies	RDT	current infection	IgG	Overall	34.25	98.65	13
45	PerfectPOC Novel Corona Virus (SARS-CoV-2) IgM/IgG Rapid Test Kit	Jiangsu Medomics Medical Technologies	RDT	current & past infection	IgM	Early (~1-7)	40.7	97.1	17
45	PerfectPOC Novel Corona Virus (SARS-CoV-2) IgM/IgG Rapid Test Kit	Jiangsu Medomics Medical Technologies	RDT	current & past infection	IgM	Intermediate (~8-14)	77.1	97.1	17
45	PerfectPOC Novel Corona Virus (SARS-CoV-2) IgM/IgG Rapid Test Kit	Jiangsu Medomics Medical Technologies	RDT	current & past infection	IgM	Late (>14)	83.9	97.1	17
45	PerfectPOC Novel Corona Virus (SARS-CoV-2) IgM/IgG Rapid Test Kit	Jiangsu Medomics Medical Technologies	RDT	current & past infection	IgG	Early (~1-7)	25.9	98.1	17
45	PerfectPOC Novel Corona Virus (SARS-CoV-2) IgM/IgG Rapid Test Kit	Jiangsu Medomics Medical Technologies	RDT	current & past infection	IgG	Intermediate (~8-14)	71.4	98.1	17
45	PerfectPOC Novel Corona Virus (SARS-CoV-2) IgM/IgG Rapid Test Kit	Jiangsu Medomics Medical Technologies	RDT	current & past infection	IgG	Late (>14)	74.2	98.1	17
45	PerfectPOC Novel Corona Virus (SARS-CoV-2) IgM/IgG Rapid Test Kit	Jiangsu Medomics Medical Technologies	RDT	current & past infection	IgG; IgM	Early (~1-7)	40.7	95.2	17
45	PerfectPOC Novel Corona Virus (SARS-CoV-2) IgM/IgG Rapid Test Kit	Jiangsu Medomics Medical Technologies	RDT	current & past infection	IgG; IgM	Intermediate (~8-14)	81.4	95.2	17
45	PerfectPOC Novel Corona Virus (SARS-CoV-2) IgM/IgG Rapid Test Kit	Jiangsu Medomics Medical Technologies	RDT	current & past infection	IgG; IgM	Late (>14)	87.1	95.2	17
46	COVID-19 (SARS-CoV-2) IgG/IgM Antibody Test Kit (Colloidal Gold)	DeepBlue Medical Technology	RDT	current & past infection	IgM	Early (~1-7)	44.4	84.3	17
46	COVID-19 (SARS-CoV-2) IgG/IgM Antibody Test Kit (Colloidal Gold)	DeepBlue Medical Technology	RDT	current & past infection	IgM	Intermediate (~8-14)	78.9	84.3	17
46	COVID-19 (SARS-CoV-2) IgG/IgM Antibody Test Kit (Colloidal Gold)	DeepBlue Medical Technology	RDT	current & past infection	IgM	Late (>14)	81.2	84.3	17
46	COVID-19 (SARS-CoV-2) IgG/IgM Antibody Test Kit (Colloidal Gold)	DeepBlue Medical Technology	RDT	current & past infection	IgM	Overall	72.3	84.3	17
46	COVID-19 (SARS-CoV-2) IgG/IgM Antibody Test Kit (Colloidal Gold)	DeepBlue Medical Technology	RDT	current & past infection	IgG	Early (~1-7)	22.2	99.1	17
46	COVID-19 (SARS-CoV-2) IgG/IgM Antibody Test Kit (Colloidal Gold)	DeepBlue Medical Technology	RDT	current & past infection	IgG	Intermediate (~8-14)	54.9	99.1	17
46	COVID-19 (SARS-CoV-2) IgG/IgM Antibody Test Kit (Colloidal Gold)	DeepBlue Medical Technology	RDT	current & past infection	IgG	Late (>14)	75	99.1	17
46	COVID-19 (SARS-CoV-2) IgG/IgM Antibody Test Kit (Colloidal Gold)	DeepBlue Medical Technology	RDT	current & past infection	IgG	Overall	53.1	99.1	17
46	COVID-19 (SARS-CoV-2) IgG/IgM Antibody Test Kit (Colloidal Gold)	DeepBlue Medical Technology	RDT	current & past infection	IgG; IgM	Early (~1-7)	44.4	84.3	17
46	COVID-19 (SARS-CoV-2) IgG/IgM Antibody Test Kit (Colloidal Gold)	DeepBlue Medical Technology	RDT	current & past infection	IgG; IgM	Intermediate (~8-14)	78.9	84.3	17
46	COVID-19 (SARS-CoV-2) IgG/IgM Antibody Test Kit (Colloidal Gold)	DeepBlue Medical Technology	RDT	current & past infection	IgG; IgM	Late (>14)	84.4	84.3	17
46	COVID-19 (SARS-CoV-2) IgG/IgM Antibody Test Kit (Colloidal Gold)	DeepBlue Medical Technology	RDT	current & past infection	IgG; IgM	Overall	73.1	84.3	17
47	Novel Coronavirus (SARSCoV-2) IgM/IgG Combo Rapid Test-Cassette	Decombio Biotechnology	RDT	current & past infection	IgG; IgM	Early (~1-7)	32	89.7	17
47	Novel Coronavirus (SARSCoV-2) IgM/IgG Combo Rapid Test-Cassette	Decombio Biotechnology	RDT	current & past infection	IgG; IgM	Intermediate (~8-14)	75.7	89.7	17
47	Novel Coronavirus (SARSCoV-2) IgM/IgG Combo Rapid Test-Cassette	Decombio Biotechnology	RDT	current & past infection	IgG; IgM	Late (>14)	77.4	89.7	17
47	Novel Coronavirus (SARSCoV-2) IgM/IgG Combo Rapid Test-Cassette	Decombio Biotechnology	RDT	current & past infection	IgG; IgM	Overall	67.5	89.7	17
47	Novel Coronavirus (SARSCoV-2) IgM/IgG Combo Rapid Test-Cassette	Decombio Biotechnology	RDT	current & past infection	IgG	Early (~1-7)	28	91.6	17
47	Novel Coronavirus (SARSCoV-2) IgM/IgG Combo Rapid Test-Cassette	Decombio Biotechnology	RDT	current & past infection	IgG	Intermediate (~8-14)	75.7	91.6	17
47	Novel Coronavirus (SARSCoV-2) IgM/IgG Combo Rapid Test-Cassette	Decombio Biotechnology	RDT	current & past infection	IgG	Late (>14)	77.4	91.6	17
47	Novel Coronavirus (SARSCoV-2) IgM/IgG Combo Rapid Test-Cassette	Decombio Biotechnology	RDT	current & past infection	IgG	Overall	66.7	91.6	17
47	Novel Coronavirus (SARSCoV-2) IgM/IgG Combo Rapid Test-Cassette	Decombio Biotechnology	RDT	current & past infection	IgM	Early (~1-7)	32	90.7	17
47	Novel Coronavirus (SARSCoV-2) IgM/IgG Combo Rapid Test-Cassette	Decombio Biotechnology	RDT	current & past infection	IgM	Intermediate (~8-14)	75.7	90.7	17
47	Novel Coronavirus (SARSCoV-2) IgM/IgG Combo Rapid Test-Cassette	Decombio Biotechnology	RDT	current & past infection	IgM	Late (>14)	77.4	90.7	17
47	Novel Coronavirus (SARSCoV-2) IgM/IgG Combo Rapid Test-Cassette	Decombio Biotechnology	RDT	current & past infection	IgM	Overall	67.5	90.7	17
48	Novel Coronavirus (2019-nCoV) Ab Test (Colloidal Gold)	Innovita Biological Technology	RDT	current & past infection	IgM	Early (~1-7)	14.8	96.3	17
48	Novel Coronavirus (2019-nCoV) Ab Test (Colloidal Gold)	Innovita Biological Technology	RDT	current & past infection	IgM	Intermediate (~8-14)	35.3	96.3	17
48	Novel Coronavirus (2019-nCoV) Ab Test (Colloidal Gold)	Innovita Biological Technology	RDT	current & past infection	IgM	Late (>14)	25	96.3	17
48	Novel Coronavirus (2019-nCoV) Ab Test (Colloidal Gold)	Innovita Biological Technology	RDT	current & past infection	IgM	Overall	28.7	96.3	17
48	Novel Coronavirus (2019-nCoV) Ab Test (Colloidal Gold)	Innovita Biological Technology	RDT	current & past infection	IgG; IgM	Early (~1-7)	25.9	96.3	17
48	Novel Coronavirus (2019-nCoV) Ab Test (Colloidal Gold)	Innovita Biological Technology	RDT	current & past infection	IgG; IgM	Intermediate (~8-14)	65.2	96.3	17
48	Novel Coronavirus (2019-nCoV) Ab Test (Colloidal Gold)	Innovita Biological Technology	RDT	current & past infection	IgG; IgM	Late (>14)	70	96.3	17
48	Novel Coronavirus (2019-nCoV) Ab Test (Colloidal Gold)	Innovita Biological Technology	RDT	current & past infection	IgG; IgM	Overall	56.9	96.3	17
49	COVID-19 IgG/IgM Rapid Test Cassette	Premier Biotech	RDT	current & past infection	IgG; IgM	Early (~1-7)	37	97.2	17
49	COVID-19 IgG/IgM Rapid Test Cassette	Premier Biotech	RDT	current & past infection	IgG; IgM	Intermediate (~8-14)	77.1	97.2	17
49	COVID-19 IgG/IgM Rapid Test Cassette	Premier Biotech	RDT	current & past infection	IgG; IgM	Late (>14)	84.4	97.2	17
49	COVID-19 IgG/IgM Rapid Test Cassette	Premier Biotech	RDT	current & past infection	IgG; IgM	Overall	70.5	97.2	17
49	COVID-19 IgG/IgM Rapid Test Cassette	Premier Biotech	RDT	current & past infection	IgM	Early (~1-7)	37	98.1	17
49	COVID-19 IgG/IgM Rapid Test Cassette	Premier Biotech	RDT	current & past infection	IgM	Intermediate (~8-14)	75.7	98.1	17
49	COVID-19 IgG/IgM Rapid Test Cassette	Premier Biotech	RDT	current & past infection	IgM	Late (>14)	81.2	98.1	17
49	COVID-19 IgG/IgM Rapid Test Cassette	Premier Biotech	RDT	current & past infection	IgM	Overall	69	98.1	17
49	COVID-19 IgG/IgM Rapid Test Cassette	Premier Biotech	RDT	current & past infection	IgG	Early (~1-7)	22.2	99.1	17
49	COVID-19 IgG/IgM Rapid Test Cassette	Premier Biotech	RDT	current & past infection	IgG	Intermediate (~8-14)	57.1	99.1	17
49	COVID-19 IgG/IgM Rapid Test Cassette	Premier Biotech	RDT	current & past infection	IgG	Late (>14)	71.9	99.1	17
49	COVID-19 IgG/IgM Rapid Test Cassette	Premier Biotech	RDT	current & past infection	IgG	Overall	53.5	99.1	17
50	Coronavirus IgG/IgM Antibody (COVID-19) Test Cassette	UCP Biosciences	RDT	current & past infection	IgM	Early (~1-7)	25.9	98.1	17
50	Coronavirus IgG/IgM Antibody (COVID-19) Test Cassette	UCP Biosciences	RDT	current & past infection	IgM	Intermediate (~8-14)	66.2	98.1	17
50	Coronavirus IgG/IgM Antibody (COVID-19) Test Cassette	UCP Biosciences	RDT	current & past infection	IgM	Late (>14)	78.1	98.1	17
50	Coronavirus IgG/IgM Antibody (COVID-19) Test Cassette	UCP Biosciences	RDT	current & past infection	IgM	Overall	60.8	98.1	17
50	Coronavirus IgG/IgM Antibody (COVID-19) Test Cassette	UCP Biosciences	RDT	current & past infection	IgG	Early (~1-7)	25.9	98.1	17
50	Coronavirus IgG/IgM Antibody (COVID-19) Test Cassette	UCP Biosciences	RDT	current & past infection	IgG	Intermediate (~8-14)	60.6	98.1	17
50	Coronavirus IgG/IgM Antibody (COVID-19) Test Cassette	UCP Biosciences	RDT	current & past infection	IgG	Late (>14)	71.9	98.1	17
50	Coronavirus IgG/IgM Antibody (COVID-19) Test Cassette	UCP Biosciences	RDT	current & past infection	IgG	Overall	56.2	98.1	17
51	EDI? Novel Coronavirus COVID-19 IgM ELISA Kit	Epitope Diagnostics	ELISA	current & past infection	IgM	Early (~1-7)	18.5	97.2	17
51	EDI? Novel Coronavirus COVID-19 IgM ELISA Kit	Epitope Diagnostics	ELISA	current & past infection	IgM	Intermediate (~8-14)	64.8	97.2	17
51	EDI? Novel Coronavirus COVID-19 IgM ELISA Kit	Epitope Diagnostics	ELISA	current & past infection	IgM	Late (>14)	71.9	97.2	17
51	EDI? Novel Coronavirus COVID-19 IgM ELISA Kit	Epitope Diagnostics	ELISA	current & past infection	IgM	Overall	56.9	97.2	17
51	EDI? Novel Coronavirus COVID-19 IgG ELISA Kit	Epitope Diagnostics	ELISA	current & past infection	IgG	Early (~1-7)	40.7	90.7	17
51	EDI? Novel Coronavirus COVID-19 IgG ELISA Kit	Epitope Diagnostics	ELISA	current & past infection	IgG	Intermediate (~8-14)	83.1	90.7	17
51	EDI? Novel Coronavirus COVID-19 IgG ELISA Kit	Epitope Diagnostics	ELISA	current & past infection	IgG	Late (>14)	81.2	90.7	17
51	EDI? Novel Coronavirus COVID-19 IgG ELISA Kit	Epitope Diagnostics	ELISA	current & past infection	IgG	Overall	73.8	90.7	17
52	Coronavirus IgG/IgM Antibody (COVID-19) Test Cassette	UCP Biosciences	RDT	current & past infection	IgG; IgM	Early (~1-7)	32.95	98.6	17
52	Coronavirus IgG/IgM Antibody (COVID-19) Test Cassette	UCP Biosciences	RDT	current & past infection	IgG; IgM	Intermediate (~8-14)	67.6	98.1	17
52	Coronavirus IgG/IgM Antibody (COVID-19) Test Cassette	UCP Biosciences	RDT	current & past infection	IgG; IgM	Late (>14)	78.1	98.1	17
52	Coronavirus IgG/IgM Antibody (COVID-19) Test Cassette	UCP Biosciences	RDT	current & past infection	IgG; IgM	Overall	61.5	98.1	17
51	EDI? Novel Coronavirus COVID-19 IgM ELISA Kit; EDI? Novel Coronavirus COVID-19 IgG ELISA Kit	Epitope Diagnostics	ELISA	current & past infection	IgG; IgM	Early (~1-7)	40.7	89.8	17
51	EDI? Novel Coronavirus COVID-19 IgM ELISA Kit; EDI? Novel Coronavirus COVID-19 IgG ELISA Kit	Epitope Diagnostics	ELISA	current & past infection	IgG; IgM	Intermediate (~8-14)	84.5	89.8	17
51	EDI? Novel Coronavirus COVID-19 IgM ELISA Kit; EDI? Novel Coronavirus COVID-19 IgG ELISA Kit	Epitope Diagnostics	ELISA	current & past infection	IgG; IgM	Late (>14)	84.4	89.8	17
51	EDI? Novel Coronavirus COVID-19 IgM ELISA Kit; EDI? Novel Coronavirus COVID-19 IgG ELISA Kit	Epitope Diagnostics	ELISA	current & past infection	IgG; IgM	Overall	75.4	89.8	17
21	VivaDiag COVID-19 IgM/IgG Rapid Test	VivaChek Biotech	RDT	current & past infection	IgM	Early (~1-7)	29.2	94.9	17
21	VivaDiag COVID-19 IgM/IgG Rapid Test	VivaChek Biotech	RDT	current & past infection	IgM	Intermediate (~8-14)	72.7	94.9	17
21	VivaDiag COVID-19 IgM/IgG Rapid Test	VivaChek Biotech	RDT	current & past infection	IgM	Late (>14)	77.4	94.9	17
21	VivaDiag COVID-19 IgM/IgG Rapid Test	VivaChek Biotech	RDT	current & past infection	IgM	Overall	65.3	94.9	17
21	VivaDiag COVID-19 IgM/IgG Rapid Test	VivaChek Biotech	RDT	current & past infection	IgG	Early (~1-7)	29.2	96	17
21	VivaDiag COVID-19 IgM/IgG Rapid Test	VivaChek Biotech	RDT	current & past infection	IgG	Intermediate (~8-14)	71.2	96	17
21	VivaDiag COVID-19 IgM/IgG Rapid Test	VivaChek Biotech	RDT	current & past infection	IgG	Late (>14)	74.2	96	17
21	VivaDiag COVID-19 IgM/IgG Rapid Test	VivaChek Biotech	RDT	current & past infection	IgG	Overall	63.6	96	17
21	VivaDiag COVID-19 IgM/IgG Rapid Test	VivaChek Biotech	RDT	current & past infection	IgG; IgM	Early (~1-7)	29.2	94.9	17
21	VivaDiag COVID-19 IgM/IgG Rapid Test	VivaChek Biotech	RDT	current & past infection	IgG; IgM	Intermediate (~8-14)	72.7	94.9	17
21	VivaDiag COVID-19 IgM/IgG Rapid Test	VivaChek Biotech	RDT	current & past infection	IgG; IgM	Late (>14)	77.4	94.9	17
52	SARS-CoV-2 Antibody Test (Lateral Flow Method)	Guangzhou Wondfo Biotech	RDT	current & past infection	IgG; IgM	Overall	69	99.1	17
7	IgG/IgM ELISA kit	Zhuhai Livzon Diagnostics	ELISA	current infection	IgG	Overall	70.8		2
7	IgG/IgM ELISA kit	Zhuhai Livzon Diagnostics	ELISA	current infection	IgM	Overall	87.5	100	2
53	COVID-19 IgG ELISA	Mologic Ltd	ELISA	n/a	IgG	Overall	88.1	97.3	18
54	One Step Novel Coronavirus (COVID-19) IgM/IgG Antibody Test	Artron Laboratories	RDT	current infection	IgM	Early (~1-7)	27.8		19
54	One Step Novel Coronavirus (COVID-19) IgM/IgG Antibody Test	Artron Laboratories	RDT	current infection	IgM	Intermediate (~8-14)	48		19
54	One Step Novel Coronavirus (COVID-19) IgM/IgG Antibody Test	Artron Laboratories	RDT	current infection	IgM	Late (>14)	95.8		19
54	One Step Novel Coronavirus (COVID-19) IgM/IgG Antibody Test	Artron Laboratories	RDT	current infection	IgM	Overall	43.2	97.9	19
54	One Step Novel Coronavirus (COVID-19) IgM/IgG Antibody Test	Artron Laboratories	RDT	current infection	IgG; IgM	Early (~1-7)	27.8		19
54	One Step Novel Coronavirus (COVID-19) IgM/IgG Antibody Test	Artron Laboratories	RDT	current infection	IgG; IgM	Intermediate (~8-14)	48		19
54	One Step Novel Coronavirus (COVID-19) IgM/IgG Antibody Test	Artron Laboratories	RDT	current infection	IgG; IgM	Late (>14)	95.8		19
54	One Step Novel Coronavirus (COVID-19) IgM/IgG Antibody Test	Artron Laboratories	RDT	current infection	IgG; IgM	Overall	43.2	100	19
54	One Step Novel Coronavirus (COVID-19) IgM/IgG Antibody Test	Artron Laboratories	RDT	current infection	IgG	Early (~1-7)	3.3		19
54	One Step Novel Coronavirus (COVID-19) IgM/IgG Antibody Test	Artron Laboratories	RDT	current infection	IgG	Intermediate (~8-14)	8		19
54	One Step Novel Coronavirus (COVID-19) IgM/IgG Antibody Test	Artron Laboratories	RDT	current infection	IgG	Late (>14)	62.5		19
54	One Step Novel Coronavirus (COVID-19) IgM/IgG Antibody Test	Artron Laboratories	RDT	current infection	IgG	Overall	14.4	100	19
55	AllTest COV-19 IgG / IgM kit	AllTest Biotech	RDT	current infection	IgM	Early (~1-7)	0		6
55	AllTest COV-19 IgG / IgM kit	AllTest Biotech	RDT	current infection	IgM	Intermediate (~8-14)	12.5		6
55	AllTest COV-19 IgG / IgM kit	AllTest Biotech	RDT	current infection	IgM	Late (>14)	39.1		6
55	AllTest COV-19 IgG / IgM kit	AllTest Biotech	RDT	current infection	IgM	Overall	21.8	76.9	6
55	AllTest COV-19 IgG / IgM kit	AllTest Biotech	RDT	current infection	IgG	Early (~1-7)	12.5		6
55	AllTest COV-19 IgG / IgM kit	AllTest Biotech	RDT	current infection	IgG	Intermediate (~8-14)	25		6
55	AllTest COV-19 IgG / IgM kit	AllTest Biotech	RDT	current infection	IgG	Late (>14)	69.6		6
55	AllTest COV-19 IgG / IgM kit	AllTest Biotech	RDT	current infection	IgG	Overall	41.8	48.1	6
56	SARS-COV-2 ELISA (IgG)	EUROIMMUN	ELISA		IgG	Overall	90	100	21
57	COVID-19 IgG/IgM Rapid Test Cassette	Healgen	RDT		IgM	overall	100	100	21
57	COVID-19 IgG/IgM Rapid Test Cassette	Healgen	RDT		IgG	overall	96.7	97.5	21
58	COVID-19 IgM-IgG Rapid Test Kit	Biomedomics	RDT		IgM	overall	86.7	97.1	21
58	COVID-19 IgM-IgG Rapid Test Kit	Biomedomics	RDT		IgG	overall	73.3	100	21
59	COVID-19 Rapid Test	Phamatech	RDT		IgM	overall	26.7	97.5	21
59	COVID-19 Rapid Test	Phamatech	RDT		IgG	overall	86.7	96.2	21
60	SARS-CoV-2 IgG/IgM Antibody Detection Kit	Tianjin Beroni Biotechnology	RDT		IgM	overall	83.3	100	21
60	SARS-CoV-2 IgG/IgM Antibody Detection Kit	Tianjin Beroni Biotechnology	RDT		IgG	overall	30	100	21
61	Architect SARS-CoV-2 IgG Assay	Abbott	CLIA		IgG	Late (>14)	97.2	100	21
62	Elecsys Anti-SARS-CoV-2 Assay	Roche	CLIA		IgG; IgM	Late (>14)	87.7	100	21
Referenes:
	1. https://www.ncbi.nlm.nih.gov/pmc/articles/PMC7184337/pdf/ciaa344.pdf
	2. https://www.ncbi.nlm.nih.gov/pmc/articles/PMC7188146/pdf/ciaa461.pdf
	3. https://jcm.asm.org/content/jcm/early/2020/03/27/JCM.00461-20.full.pdf
	4. https://www.ijidonline.com/article/S1201-9712(20)30198-3/pdf
	5. https://rpmesp.ins.gob.pe/index.php/rpmesp/article/view/5534
	6. https://www.medrxiv.org/content/10.1101/2020.04.11.20062158v2.full.pdf
	7. https://www.medrxiv.org/content/10.1101/2020.03.04.20030916v2.full.pdf
	8. https://onlinelibrary.wiley.com/doi/10.1002/jmv.25800
	9. https://www.medrxiv.org/content/10.1101/2020.03.23.20041707v1.full.pdf
	10. https://www.medrxiv.org/content/10.1101/2020.03.27.20045153v1.full.pdf
	11. https://www.medrxiv.org/content/10.1101/2020.04.03.20052183v1
	12. https://www.medrxiv.org/content/10.1101/2020.02.27.20028787v1.full.pdf+html
	13. https://onlinelibrary.wiley.com/doi/abs/10.1002/jmv.25727
	14. https://www.medrxiv.org/content/10.1101/2020.03.13.20035428v1
	15. https://www.medrxiv.org/content/10.1101/2020.04.09.20056325v1.full.pdf
	16. https://www.sciencedirect.com/science/article/pii/S0033350620301141
	17. https://covidtestingproject.org/
	18. https://www.medrxiv.org/content/10.1101/2020.04.29.20082099v1.full.pdf
	19. https://www.medrxiv.org/content/10.1101/2020.04.22.20075564v1.full.pdf
	20. FindDx reported independent evaluation database [https://www.finddx.org/covid-19/dx-data/]
	21. FDA Independent Evaluation of COVID-19 Serological Tests (accessed June 5, 2020). https://open.fda.gov/apis/device/covid19serology/

## Sheet: test codes
No.	Test Name	Manufacturer	Ref No.
1	IgG/IgM ELISA kits	Beijing Wantai Biological Pharmacy	1
2	Wantai SARS-CoV-2 Ab ELISA	Beijing Wantai Biological Pharmacy	15
3	Wantai SARS-CoV-2 IgG ELISA	Beijing Wantai Biological Pharmacy	9
4	Wantai SARS-CoV-2 IgM ELISA	Beijing Wantai Biological Pharmacy	9
5	Wantai SARS-CoV-2 Ab Rapid Test	Beijing Wantai Biological Pharmacy	9
6	CMIA-IgM	Xiamen InnoDx Biotech Co., Ltd.	9
7	IgG/IgM ELISA kit	Zhuhai Livzon Diagnostics Inc	2
8	2019-nCoV IgG/IgM Antibody Detection Kit	Zhuhai Lizhu Reagent	3
9	SARS-CoV-2 IgM/IgG CLIA kits	Shenzhen Yhlo Biotech	4
10	Chemiluminescence detection kit	Shenzhen Yhlo Biotech	7
11	2019-nCoV IgG/IgM Rapid Test Cassette	Zhejang Orient Gene Biotech	5
12	STANDARD Q COVID-19 IgM/IgG Duo Test	SD BIOSENSOR, Inc.	20
13	MAGLUMI 2019-nCoV IgM (CLIA)	Snibe Co.	20
14	COVID-19 IgG/IgM Combo Rapid Test Device	Liming Bio-Products	20
15	AllTest COV-19 IgG / IgM kit	AllTest Biotech	6
16	Cellex qSARS-CoV-2 IgGIgM Cassette Rapid Test	Cellex	20
17	SARS-CoV-2 IgM/IgG Ab Rapid Test	Shanghai Kehua Bio-engineering	20
18	COVID-19 rapid test	PRIMA Lab S.A.	20
19	COVID-19 ELISA IgG	DIA PRO Diagnostic BioProbes	20
20	COVID-19 ELISA IgG	Epitope Diagnostics	20
21	VivaDiag COVID-19 IgM/IgG Rapid Test	VivaChek Biotech	8
22	Coronavirus IgG/IgM antibody GICA kit	Zhuhai Livzon Diagnostics	9
23	SARS-CoV-2 ELISA	Darui Biotech	10
24	Rapid SARS-CoV-2 Antibody (IgM/IgG)	InTec Products	20
25	COVID-19 IgG/IgM Rapid Test Cassette (Whole Blood/Serum/Plasma)	Orient Gene / Healgen	20
26	2019-nCoV IgG/IgM Rapid Test	Dynamiker Biotechnology	20
27	Novel Coronavirus IgG/IgM antibody ELISA kit	Zhuhai Livzon Diagnostics	12
28	Novel Coronavirus (2019- nCoV) IgM/IgG Antibody Test Kit	Zhuhai Livzon Diagnostics	14
21	VivaDiag COVID-19 IgM/IgG Rapid Test	VivaChek Biotech	8
29	Anti-SARS-CoV-2 ELISA (IgG) (manual, automated)	EUROIMMUN AG	15
30	OnSite COVID-19 IgG/IgM Rapid Test	CTK Biotech, Inc.	15
31	Anti-SARS-CoV-2 Rapid Test	AutoBio Diagnostics	15
No.	Test Name	Manufacturer	Ref No.
32	Coronavirus Diseases 2019 (COVID-19) IgM/IgG Antibody Test	Artron Laboratories	15
33	NG-Test IgM-IgG COVID All-in-One lateral flow immunoassay	NG Biotech	20
34	Covid-19 IgG/IgM Antibody Test	Biomerica	20
35	Acro Biotech COVID-19 Rapid POC test	Acro Biotech	20
36	Rapid SARS-CoV-2 Antibody (IgM/IgG)	InTec Products	20
37	DiagnoSure COVID-19 IgG/IgM rapid test cassette	GritOverseas Pte.	20
38	Diagnostic kit IgM/IgG of Novel Coronavirus COVID-19	Shanghai LiangRun, Biomedicine Tech	20
39	COVID-19 IgG/IgM Rapid Test Cassette (Whole Blood/Serum/Plasma)	Orient Gene / Healgen	20
40	COVID-19 rapid test	PharmaAct AG	16
41	Rapid SARS-CoV-2 Antibody (IgM/IgG)	AMEDA Labordiagnostik GmbH	20
42	SARS-CoV-2 IgM/IgG Ab Rapid Test	Sure Bio-Tech (USA)	17
43	COVID-19 IgM-IgG Dual Antibody Rapid Test	BioMedomics	17
44	Novel Coronavirus (2019-nCoV) Ab Test (Colloidal Gold)	Innovita Biological Technology	17
45	SARS-CoV-2 rapid IgG-IgM Viva-DiagTM Test combined antibody test	Jiangsu Medomics Medical Technologies	11
46	COVID-19 (SARS-CoV-2) IgG/IgM Antibody Test Kit (Colloidal Gold)	DeepBlue Medical Technology	17
47	Novel Coronavirus (SARSCoV-2) IgM/IgG Combo Rapid Test-Cassette	Decombio Biotechnology	17
48	Novel Coronavirus (2019-nCoV) Ab Test (Colloidal Gold)	Innovita Biological Technology	17
49	COVID-19 IgG/IgM Rapid Test Cassette	Premier Biotech	17
50	Coronavirus IgG/IgM Antibody (COVID-19) Test Cassette	UCP Biosciences	17
51	EDI? Novel Coronavirus COVID-19 IgM ELISA Kit	Epitope Diagnostics	17
52	Coronavirus IgG/IgM Antibody (COVID-19) Test Cassette	UCP Biosciences	17
53	COVID-19 IgG ELISA	Mologic Ltd	18
54	One Step Novel Coronavirus (COVID-19) IgM/IgG Antibody Test	Artron Laboratories	19
55	AllTest COV-19 IgG / IgM kit	AllTest Biotech	6
56	SARS-COV-2 ELISA (IgG)	EUROIMMUN	21
57	COVID-19 IgG/IgM Rapid Test Cassette	Healgen	21
58	COVID-19 IgM-IgG Rapid Test Kit	Biomedomics	21
59	COVID-19 Rapid Test	Phamatech	21
60	SARS-CoV-2 IgG/IgM Antibody Detection Kit	Tianjin Beroni Biotechnology	21
61	Architect SARS-CoV-2 IgG Assay	Abbott	21
62	Elecsys Anti-SARS-CoV-2 Assay	Roche	21
